1 | **÷ Development of locomotion in low water exposure using sturgeon**

2  
3 | **Anshin. Asano-Hoshino<sup>a,\*</sup>, Hideyuki. Tanaka<sup>b</sup>, Takashi. Nakakura<sup>b</sup>,**  
4 | **Toshiaki. Tsuji<sup>c</sup>, Takuo. Mizukami<sup>d</sup>**

5 |  
6 | <sup>a</sup>Department of Sports and Medical Science, Teikyo University, Tokyo, Japan.  
7 | 359 Otsuka, Hachioji, Tokyo 192-0495, Japan.

8  
9 | <sup>b</sup>Department of Anatomy and Cell Biology, Teikyo University School of Medicine, Tokyo,  
10 | Japan.  
11 | 2-11-1 Kaga, Itabashi-ku, Tokyo 173-8605, Japan.

12  
13 | <sup>c</sup>Department of Electronic Information System School of Science and Technology Saitama  
14 | University, Saitama, Japan.  
15 | 255 Shimo-Okubo, Sakura-ku, Saitama City, Saitama 338-8570, Japan.

16  
17 | <sup>d</sup>Department of Safety Research on Blood and Biological Products, National Institute of  
18 | Infectious Disease, Tokyo, Japan.  
19 | 4-7-1 Gakuen, Musashimurayama-shi, Tokyo 208-0011, Japan.

20  
21 | \*Corresponding author

22 | Anshin Asano-Hoshino, Ph.D.,

23 | Faculty of Medical Technology, Teikyo University, Department of Sports and Medical Science  
24 | Tokyo, Japan

25 | 359 Otsuka, Hachioji, Tokyo 192-0495, Japan

26 | Tel: +81-42-678-3388

27 | E-mail: [anshin@med.teikyo-u.ac.jp](mailto:anshin@med.teikyo-u.ac.jp)

28  
29 | **Keywords:** quadrupedal locomotion, sturgeon, escape response, fish-tetrapod transition, evolution

30

31

32 **Abstract:** The evolution of early land vertebrates from aquatic forms of life was a biological  
33 milestone. The transition to land was accompanied with expectedly challenging physiological  
34 and morphological evolutionary hurdles. So far, fossil records have provided substantial  
35 information on the origin of quadrupedal locomotion. However, fossil evidence alone is  
36 insufficient to understand how the soft-tissue-dependent motor functions and locomotion were  
37 acquired and developed. In the present study, we focus on locomotion of the sturgeon, an extant  
38 primitive fish, as a new experimental model, to investigate behavioural plasticity. Their  
39 locomotion in low-water-level conditions was similar to an escape response in water, the  
40 C-start escape response, which is used by most fish and amphibian juveniles to avoid predation.  
41 Sturgeons were also found to have mastered rolling-over in response to low water levels,  
42 resulting in the improvement of their trunk-twisting action. Sturgeons acquired an efficient shift  
43 in their centroid, thereby improving their mobility. We hypothesise that the escape response  
44 triggered by environmental hazards drove the development of locomotion, which was  
45 accompanied by a variety of behaviours.

46

47 **Introduction**

48 Animal locomotion is any of a variety of ways that animals use to move from one place to  
49 another. Forms of locomotion include, walking, running, jumping, swimming, and flying.  
50 About 20,000 species of fish live in the hydrosphere, including the sea, rivers, and lakes. In  
51 general, fish live a lifetime in the water, but some fish live in intertidal zones and tidal flats.  
52 These fish are constantly exposed to environmental changes compared to underwater.  
53 Therefore, these fishes have modified their behaviour and physiological functions suitable for  
54 the habitat (Nelson, 2006) In the Devonian period, 400 million years ago, the pectoral and  
55 pelvic fins of fish evolved into appendicular structures, enabling terrestrial locomotion.  
56 However, it remains unclear what kind of environment provoked the evolution of these  
57 appendicular structures and what kind of mechanisms contributed to the development of  
58 terrestrial locomotion (Goetz et al., 2015; Grande and Bemis, 1991; Gregory and Raven, 1941;  
59 Niedźwiedzki et al., 2010). Recent studies have reported some interesting results in  
60 morphological and behavioural approaches to understanding the origins of quadrupedal  
61 locomotion. King et al. (King et al., 2011) observed the underwater behaviour of lungfish, one  
62 of the few species of extant finned sarcopterygians, which showed locomotion similar to  
63 terrestrial walking. Other studies demonstrated that *Polypterus*, the extant fish closest to the  
64 common ancestor of actinopterygians and sarcopterygians, exhibited developmental and  
65 phenotypic plasticity when exposed to low water levels (Standen et al., 2014; Standen et al.,  
66 2016) Lungfish and *Polypterus* are both capable of spontaneously moving onto land in search  
67 for water and food and, thus, already seem to have terrestrial locomotive function (Du and  
68 Standen, 2017; Du et al., 2016; Graham et al., 2014). It is important, therefore, to focus on  
69 behavioural plasticity by using fish that is always swimming in the water as new experimental  
70 models and analysis system to make inferences on the diverse processes that led to  
71 terrestrialisation. From an evolutionary perspective, we are interested in how unspecialised  
72 fishes that constantly swim in water locomote when exposed to different terrestrial

73 environments. In this study, we experimentally exposed sturgeon to terrestrial environments,  
74 with the aim of visualisation and quantification of changes in its locomotion during the  
75 adaptation from aquatic to terrestrial environments; we also explored the mechanisms  
76 underlying this process..

77

78

## 79 **Materials and methods**

### 80 **Experimental animals**

81 We used Bester, a hybrid sturgeon between *Huso huso* and *Acipenser ruthenus*. Fujikin  
82 Corporation provided the fish. Reliable non-invasive sex determination of Bester is not  
83 anatomically possible; as a result, animals were kept and studied in unmarked mixed-sex  
84 groups. Animal growth was monitored by assessing the fish length and weight upon entry in  
85 the environments. All fish had been raised in fully aquatic environments (n = 42). The fish were  
86 divided into the aquatic environment (control, n = 10) and the terrestrial environment (treatment,  
87 n = 52) groups. We performed animal experiments in compliance with the regulation for  
88 animal experiments of Teikyo University.

89

### 90 **Rearing environments**

91 Two 400-L and one 200-L overflow tanks were connected to a 200-L filtration tank, and used  
92 as a circulation/filtration system with a total water capacity of 1.2 m<sup>3</sup>. Each tank was connected  
93 to an airstone using a blower air pump for the septic tank (Nippon Denko, NIP-40L) with  
94 aeration. The sturgeons were fed 2–3 times a day with pellet-type feed (feed dedicated to  
95 carnivorous benthic fish, Kyorin, Hikari Crest Cat) suitable for their size that allows rapid  
96 consumption.

97

## 98 **Exposure to low water levels**

99 The room temperature was set at 20 °C. An automated mist system (Foresta, Zero Plants) and a  
100 shower pipe (EHEIM) were used regularly, and the water quality at low water levels was  
101 ensured by constantly pouring water through 2-mm pores at the top of tanks. Since the sturgeon  
102 cannot eat during low-water-level conditions due to its suction-type mouth, 5 days a week were  
103 set at low-water-level, whereas the remaining 2 days at normal water level to allow feeding and  
104 swimming. Their body weights decreased during the low-water-level conditions, but recovered  
105 in the following 2 days, totally resulting in weight gains in a week.

106

## 107 **Measurements**

108 Quantitative analyses on zero moment point (ZMP) during the exposure of sturgeons to low  
109 water levels were performed using the Haptic Cutting Board system and Digital Array system  
110 (Pressure Profile System Co.), which we developed in collaboration with Saitama University.  
111 This sensor enabled us to visualise the loads involved in the locomotion in more detail. We  
112 visualised the temporal changes in the positional information of a point, called the ZMP, and  
113 the dynamic components during the low-water-level locomotion in three-dimensional vectors  
114 (Totsu et al., 2015; Tsuji et al., 2009). In other words, ZMP is a dynamic barycentric centre,  
115 implying that biped locomotion could be achieved by applying evolutionary constraints and  
116 conditions that repeatedly forced ZMP to achieve locomotion on land.

117

## 118 **Image files**

119 All behavioural sequences were filmed at frames 1080p/60fps using i-phone 6S (Apple) and  
120 full-HD HDC-TM750 Camera (Panasonic). The following picture was created by captured  
121 movie files.

122

123

## 124 **Results**

125 Our observations of sturgeons swimming patterns under normal water conditions revealed that  
126 their pectoral fins do not contribute substantially to locomotion, whereas the trunks operate in a  
127 wavelike manner to drive forward movement (Figure 1A) (LINDSEY and CC, 1978; Wilga  
128 and Lauder, 1999). This observation indicates that the sturgeon has higher propulsion during  
129 underwater locomotion than the lungfish and the polypterus, which are benthic and generally  
130 remain stationary.

131 The sturgeons could thrive even when the water level was lowered to the eye level.  
132 Under 100% water level (whole-body immersion), sturgeons only exhibited swimming with an  
133 S-shaped wavelike movement of the trunk. When the water was lowered to 75%, crawling  
134 movements with pectoral fins, folded on alternate sides, were often observed. At 50% water  
135 level, the frequency of crawling increased, and when it was further lowered to 25%, we  
136 observed crawling at a higher frequency. In particular, Polypterus showed both behavioural and  
137 quantitative changes in terms of locomotion (Figures 1B, 1D, 1E, and 1F). Thus, our results  
138 indicate that the locomotion of the sturgeon underwater is swimming with an S-shaped  
139 wavelike movement of the trunk, and it switches to crawling depending on the water level  
140 (Figures 1E and 1F). This switching may be mediated by the perceived decrease in propulsion,  
141 as well as the changes in sound, gravity, and water flow.

142 We carefully observed the crawling movement and found that the sturgeons showed  
143 movements similar to a reflex response, called the C-start escape response. Fish and  
144 amphibians share this response when they perceive hazardous stimuli (Figure 1D and  
145 Supplementary Material, Movie1). We named this response the “C-start-like crawling” (from  
146 now on referred to as CSLC). The C-start escape response is a sudden escape response

147 behaviour that the juveniles of most fish and amphibians (e.g., tadpoles) exhibit in response to  
148 “fear” stimuli, such as sounds and waves underwater. The response allows them to accelerate  
149 and escape quickly and involves a C-shape contraction of the side muscles on the opposite side  
150 from the stimuli, and accompanied by swings of the caudal fin (Figure 1C) (Domenici and  
151 Blake, 1997; Wassersug, 1989). A peculiar single movement is observed when fish show  
152 escape response behaviours underwater (Watanabe et al., 2014), whereas the sturgeons exposed  
153 to low water levels in our study used sequential CSLC for locomotion. The reflex responses  
154 appeared repeatedly on the same side (61%), unlike terrestrial walking, which involves  
155 alternating movements (39%) (Figure 1G). Sturgeons with body lengths of 20 cm had an  
156 average moving distance of  $3.49 \pm 0.78$  cm and  $106.24 \pm 9.11^\circ$  at a time (Supplementary  
157 Material figure S2). We observed CSLC in all fish ( $n = 40$ ) immediately after exposure to  
158 stimuli. These results suggest that many kinds of fish are capable of terrestrial locomotion once  
159 adapted to the exposure to the atmosphere. Similar experiments on young sturgeons (1–2 weeks  
160 old) and Japanese catfish revealed C-start escape response behaviours immediately after  
161 exposure to stimuli (Supplementary Material figure S1).

162         We also checked sequential ventral photographs of CSLC motion. In this experiment,  
163 CSLC was viewed from the ventral side of the fish on a glass plate; interestingly, we observed  
164 that the pelvic fins were in contact with the glass plate when the sturgeon moved forward using  
165 CSLC. On the other hand, when the sturgeon bent its body by moving its tail and head, its  
166 pelvic fins were not in contact with the glass (Figure 2).

167         Based on the measurements of the surface pressure distribution during locomotion  
168 under low-water-level conditions, we found that the sturgeons could only apply weak loads to  
169 the entire lower surface of their trunks with CSLC (Figure 3A). On the other hand, the  
170 sturgeons that acquired the twisting action before producing long-distance movements could  
171 apply strong and timely local loads, with the heaviest load applied via the lateral bending  
172 C-shape. Interestingly, we found that the sturgeons mechanically applied the loads not only to

173 the pectoral fin region and the thoracic appendage but also to the pelvic fin region and the  
174 abdominal appendage (Figure 3B). These results indicate that rearing in low-water-level  
175 conditions enabled CSLC-mediated load control during locomotion using not only pectoral but  
176 also pelvic fins. These results, together with a previous report showing that the escape route  
177 changed when pelvic fins were removed, also suggest that the pelvic fins act as the “brake,” and  
178 is the turning axis for the C-start escape response underwater (Kawabata et al., 2016; Standen,  
179 2008) and that the pectoral and pelvic fins are involved in the initial terrestrial locomotion.

180 After exposure to low water levels, the sturgeons were unable to roll over to a normal  
181 posture for several hours. However, after rearing them in this environment for a few days, we  
182 found that most of them had mastered the ability to roll over to a normal posture while  
183 repeating lateral bending, which is normally used to swim underwater (Figure 4A). The  
184 rolling-over indicated the development of a trunk-twisting action (Figure 4B). Consequently,  
185 when we tried to roll them over, by applying resistance, they could recover their normal posture,  
186 often assuming a posture with their pectoral fins fully expanded when lying in the prone  
187 position. In addition, fish were able to move by jumping, resulting in dramatically longer  
188 movements (Figures S4 and 6G). Thus, the sturgeons distinctively adapt to the new  
189 environment and develop their motor functions, through enhanced trunk-twisting action. These  
190 adaptations generally occurred within the first 10 days after the exposure to low water levels  
191 (Figure 4C).

192 We observed that the locomotion pattern changed, and the moving distance extended  
193 during the development of sturgeon locomotion, which was enabled by an originally developed  
194 tactile sensor system (BARCLAY, 1946; Totsu et al., 2015; Tsuji et al., 2009). This system can  
195 help visualize and measure the direction and magnitude of forces applied to support surfaces on  
196 a millisecond scale. Our results using this system revealed that the position of the ZMP during  
197 the locomotion process by CSLC moved right and left slightly behind the pectoral fins in  
198 conjunction with trunk bending (Figure 5). This finding indicates that the pressure centre of the



199 floor-reaction force is located close to the pectoral fin. Therefore, propulsion on the land mainly  
200 used the front load of the pectoral fin region.

201 Detailed quantitative analysis of CSLC in sturgeons immediately after exposure and  
202 after the acquisition of the ability to roll over, revealed that the former moved little by little with  
203 a distance of 10 mm or less (Figures 6C and 6G), while the latter stayed stationary without  
204 locomotion but could move long distances instantaneously during locomotion by CSLC  
205 (Figures 6F and 6G). In comparison with the sturgeons immediately after exposure to low  
206 water levels, the vector of ZMP in the sturgeons after acquiring the ability to roll over generated  
207 loads 2.3 times (Figures 6B and 6E) and 1.9 times (Figures 6A and 6D) more efficiently in the  
208 horizontal (X and Y axes) and vertical (Z axis) directions. These results culminate with the  
209 observed increase ( $\times 3.3$ ) in the moving distance (Figure 6G). These results indicate that the  
210 locomotion of sturgeons under low-water-level conditions was improved by effectively  
211 controlling the load onto the ground, as a result of a stronger twisting force around the body  
212 axes, mediated by the ability to roll over.

213

## 214 **Discussion**

215 In this study, we visualised fish locomotion by experimentally exposing sturgeons to low water  
216 levels. Since CSLC is the escape response typical to all fish in water, many kinds of fish could  
217 have potentially used it for locomotion. The sturgeons appeared to become stationary a few  
218 minutes after exposure to low water levels, and subsequently, they moved and changed  
219 directions by continuously performing complicated and irregular CSLCs. The continuity of  
220 locomotion observed may reflect continuous reflex responses in response to constant stimuli  
221 due to environmental changes, such as gravity and sound, during the shift from aquatic to  
222 terrestrial environments. New-born zebrafish—which exhibit motor functions comparable to  
223 those of adult fish on the second day after fertilisation—reportedly show the continuous firing

224 of C-start escape responses during the early stages, but later acquire single firing of Meissner's  
225 corpuscle in association with the development of auditory inputs. In this experiment, the lateral  
226 line, a sensory organ that senses water flow in fish, as well as auditory sensations, could have  
227 influenced the sturgeons in various ways, leading to the development of terrestrial locomotion.  
228 Our mechanical analysis demonstrated that the change in locomotion over time allowed the  
229 sturgeon to acquire a rolling-over motion from the S-shaped two-dimensional wavelike motion.  
230 In turn, these movements increased the twisting force of the trunk, generating diversity and  
231 efficiency in the three-dimensional modes of movement. This locomotion pattern acquisition  
232 may partially recall the process by which modern terrestrial vertebrates evolved their walking  
233 behaviour.

234         The results of our experiments also suggest the possibility that sturgeons used a similar  
235 system to develop locomotion from reflex responses (Gesell et al., 1934; Karaca et al., 2013;  
236 McGraw, 1941). Fish such as mudskippers, Shuttles hopfish, and blennies, which are known  
237 to thrive on land for extended periods, often move their tails quickly by bending them toward  
238 their heads and then straightening them, which allows the fish to move and jump (Ashley-Ross  
239 et al., 2013; Flammang et al., 2016; Hsieh, 2010; McFarlane et al., 2019; Nasuchon et al., 2016;  
240 Pace and Gibb, 2014) This common aspect in the locomotion of low-water-level-exposed  
241 sturgeon and fish that have achieved terrestrialisation, is attractive in terms of our understanding  
242 of the behavioural potential of fish.

243         A recent study reported that the tides on Earth 400 million years ago were stronger than  
244 present-day tides and that there is a correlation between strong tides and the places where the  
245 terrestrialisation of fish frequently occurred, and actinopterygian fossils were found (Balbus,  
246 2014). In this study, we reared the sturgeons at low water levels for five days and underwater  
247 for two days, which allowed long-term rearing under low-water-level conditions. These  
248 conditions may be similar to the environment of 400 million years ago. Isotopic measurements  
249 and elemental analyses suggest that environmental changes such as hypoxia repeatedly

250 occurred in the late Devonian period, implying that relatively large numbers of fishes may have  
251 used terrestriation as a passive escape behaviour depending on prevailing conditions  
252 (Joachimski and Buggisch, 2002; Murphy et al., 2000). Although primitive amphibians, such as  
253 Ichthyostega, are believed to have had large forelimbs and moved in a forelimb-driven manner  
254 on their belly, most animals including amphibians, and those that emerged after amphibians,  
255 developed their lower limbs for use in locomotion (BARCLAY, 1946; Pierce et al., 2012).

256         Regarding the functional and anatomical differences in the locomotion pattern,  
257 sturgeons took their posture with maximally spread pectoral fins when resting, whereas, during  
258 CSLC, the loads were applied to pectoral and pelvic fin regions on one side of their bodies with  
259 their fins folded. These results suggest that angle of pectoral girdle and fin was spread and the  
260 trunk-twisting action may lead to gradual increases in the contribution of the pelvic fin region in  
261 moving process on land. Although the sturgeons observed in this study do not represent  
262 dramatic species diversification, our results show the possibility that the longer a fish  
263 spends on land due to environmental changes, the greater the chances of gaining athletic  
264 benefits and ultimately may improve fish survival

265

266 **Acknowledgements:** The authors wish to thank Dr. Atsushi Ishimatsu for his kind and helpful  
267 support in this study. The authors also wish to thank Dr. Haruo Hagiwara for his technical  
268 assistance. The Bester (hybrid sturgeons) used in this study were provided by the Fujikin  
269 Corporation. This work was supported by the Grant for Scientific Research Fund (No. 270002  
270 and No. 300006) from the Teikyo University to A. Asano.

271

## 272 **Author contributions**

273 Authors' contributions Anshin Asano-Hoshino designed the study and wrote the initial draft of  
274 the manuscript. Drs. Hideyuki Tanaka, Nakakura Takashi, and Toshiaki Tsuji contributed to the

275 analysis and interpretation of data, and Dr. Takuo, Mizukami, assisted in the preparation of the  
276 manuscript. All other authors have contributed to data collection and interpretation, and  
277 critically reviewed the manuscript. All authors approved the final version of the manuscript and  
278 agree to be accountable for all aspects of the work in ensuring that questions related to the  
279 accuracy or integrity of any part of the work are appropriately investigated and resolved.

280

281

282

### 283 **References and Notes:**

- 284 **Ashley-Ross, M. A., Hsieh, S. T., Gibb, A. C. and Blob, R. W.** (2013). Vertebrate land invasions-past, present,  
285 and future: An introduction to the symposium. *Integrative and Comparative Biology* **53**, 192–196.
- 286 **Balbus, S. A.** (2014). Dynamical, biological and anthropic consequences of equal lunar and solar angular radii.  
287 *Proceedings of the Royal Society A: Mathematical, Physical and Engineering Sciences* **470**,.
- 288 **BARCLAY, O. R.** (1946). The mechanics of amphibian locomotion. *The Journal of experimental biology* **23**, 177–  
289 203.
- 290 **Domenici, P. and Blake, R. W.** (1997). Review: The kinematics and performance of fish fast-start swimming. *The*  
291 *Journal of Experimental Biology* **200**, 1165–1178.
- 292 **Du, T. Y. and Standen, E. M.** (2017). Phenotypic plasticity of muscle fiber type in the pectoral fins of *Polypterus*  
293 *senegalus* reared in a terrestrial environment. *Journal of Experimental Biology*.
- 294 **Du, T., Larsson, H. and Standen, E.** (2016). Observations of terrestrial locomotion in wild *Polypterus senegalus*  
295 from Lake Albert, Uganda. *African Journal of Aquatic Science* **41**, 67–71.
- 296 **Flammang, B. E., Suvarnaraksha, A., Markiewicz, J. and Soares, D.** (2016). Tetrapod-like pelvic girdle in a  
297 walking cavefish. *Scientific Reports* **6**, 1–8.
- 298 **Gesell, A., Thompson, H. and Amatruda, C. S.** (1934). *Infant behavior: Its genesis and growth*. New York:  
299 McGraw-Hill Book Company.
- 300 **Goetz, C., Pivetta, C. and Arber, S.** (2015). Distinct Limb and Trunk Premotor Circuits Establish Laterality in the  
301 Spinal Cord. *Neuron* **85**, 131–145.
- 302 **Graham, J. B., Wegner, N. C., Miller, L. A., Jew, C. J., Lai, N. C., Berquist, R. M., Frank, L. R. and Long, J.**  
303 **A.** (2014). Spiracular air breathing in polypterid fishes and its implications for aerial respiration in stem  
304 tetrapods. *Nature Communications* **5**, 1–6.
- 305 **Grande, L. and Bemis, W. E.** (1991). Osteology and Phylogenetic Relationships of Fossil and Recent Paddlefishes  
306 (Polyodontidae) with Comments on the Interrelationships of Acipenseriformes. *Journal of Vertebrate*  
307 *Paleontology* **11**, 1–121.
- 308 **Gregory, W. K. and Raven, H. C.** (1941). PART I: PAIRED FINS AND GIRDLES IN OSTRACODERMS,

- 309 PLACODERMS, AND OTHER PRIMITIVE FISHES. *Annals of the New York Academy of Sciences* **42**,  
310 275–291.
- 311 **Hsieh, S. T. T.** (2010). A locomotor innovation enables water-land transition in a marine fish. *PLoS ONE* **5**,  
312 **Joachimski, M. M. and Buggisch, W.** (2002). Conodont apatite  $\delta^{18}\text{O}$  signatures indicate climatic cooling as a  
313 trigger of the Late Devonian mass extinction. *Geology* **30**, 711.
- 314 **Karaca, S., Tan, M. and T, ner** (2013). Humans Walking on all Four Extremities with Mental Retardation and  
315 Dysarthric or no Speech: A Dynamical Systems Perspective. In *Developmental Disabilities - Molecules*  
316 *Involved, Diagnosis, and Clinical Care*, p. InTech.
- 317 **Kawabata, Y., Yamada, H., Sato, T., Kobayashi, M., Okuzawa, K. and Asami, K.** (2016). Pelvic fin removal  
318 modifies escape trajectory in a teleost fish. *Fisheries Science* **82**, 85–93.
- 319 **King, H. M., Shubin, N. H., Coates, M. I. and Hale, M. E.** (2011). Behavioral evidence for the evolution of  
320 walking and bounding before terrestriality in sarcopterygian fishes. *Proceedings of the National Academy of*  
321 *Sciences* **108**, 21146–21151.
- 322 **LINDSEY and CC** (1978). Form, function, and locomotory habits in fish. *Fish Physiology* 1–100.
- 323 **McFarlane, W., Rossi, G. S. and Wright, P. A.** (2019). Amphibious fish “get a jump” on terrestrial locomotor  
324 performance after exercise training on land. *Journal of Experimental Biology*.
- 325 **McGraw, M. B.** (1941). Neural maturation of the infant as exemplified in the righting reflex, or rolling from a  
326 dorsal to a prone position. *The Journal of Pediatrics* **18**, 385–394.
- 327 **Murphy, A. E., Sageman, B. B. and Hollander, D. J.** (2000). Eutrophication by decoupling of the marine  
328 biogeochemical cycles of C, N, and P: A mechanism for the Late Devonian mass extinction. *Geology* **28**, 427.
- 329 **Nasuchon, N., Yagi, M., Kawabata, Y., Gao, K. and Ishimatsu, A.** (2016). Escape responses of the Japanese  
330 anchovy *Engraulis japonicus* under elevated temperature and CO<sub>2</sub> conditions. *Fisheries Science* **82**, 435–444.
- 331 **Nelson, J. S.** (2006). *Fishes of the World, 4th Edition*.
- 332 **Niedzwiedzki, G., Szrek, P., Narkiewicz, K., Narkiewicz, M. and Ahlberg, P. E.** (2010). Tetrapod trackways  
333 from the early Middle Devonian period of Poland. *Nature* **463**, 43–48.
- 334 **Pace, C. M. and Gibb, A. C.** (2014). Sustained periodic terrestrial locomotion in air-breathing fishes. *Journal of*  
335 *Fish Biology* **84**, 639–660.
- 336 **Pierce, S. E., Clack, J. A. and Hutchinson, J. R.** (2012). Three-dimensional limb joint mobility in the early  
337 tetrapod *Ichthyostega*. *Nature* **486**, 523–6.
- 338 **Standen, E. M.** (2008). Pelvic fin locomotor function in fishes: three-dimensional kinematics in rainbow trout  
339 (*Oncorhynchus mykiss*). *Journal of Experimental Biology* **211**, 2931–2942.
- 340 **Standen, E. M., Du, T. Y. and Larsson, H. C. E.** (2014). Developmental plasticity and the origin of tetrapods.  
341 *Nature* **513**, 54–58.
- 342 **Standen, E. M., Du, T. Y., Laroche, P. and Larsson, H. C. E.** (2016). Locomotor flexibility of *Polypterus*  
343 *senegalus* across various aquatic and terrestrial substrates. *Zoology*.
- 344 **Totsu, N., Okumura, D., Sakaino, S. and Tsuji, T.** (2015). Development of a Haptic Cutting Board with a Force  
345 Visualization System. *The Abstracts of the international conference on advanced mechatronics : toward*  
346 *evolutionary fusion of IT and mechatronics : ICAM 2015.6*, 211.
- 347 **Tsuji, T., Kaneko, Y. and Abe, S.** (2009). Whole-Body Force Sensation by Force Sensor With Shell-Shaped  
348 End-Effector. *IEEE Transactions on Industrial Electronics* **56**, 1375–1382.

- 349 **Wassersug, R. J.** (1989). Locomotion in Amphibian Larvae (Or &quot;Why Aren't Tadpoles Built like  
350 Fishes?&quot;) Locomotion in Amphibian Larvae (or &quot;Why Aren't Tadpoles Built Like  
351 Fishes?&quot;)1. *Source: American Zoologist Amer. Zool* **29**, 65–8465.
- 352 **Watanabe, T., Shimazaki, T., Mishiho, A., Suzuki, T., Hirata, H., Tanimoto, M. and Oda, Y.** (2014).  
353 Coexpression of auxiliary Kv 2 subunits with Kv1.1 channels is required for developmental acquisition of  
354 unique firing properties of zebrafish Mauthner cells. *Journal of Neurophysiology* **111**, 1153–1164.
- 355 **Wilga, C. D. and Lauder, G. V** (1999). Locomotion in sturgeon: function of the pectoral fins. *Journal of*  
356 *Experimental Biology* **202**, 2413–2432.
- 357

358 **Figure captions**

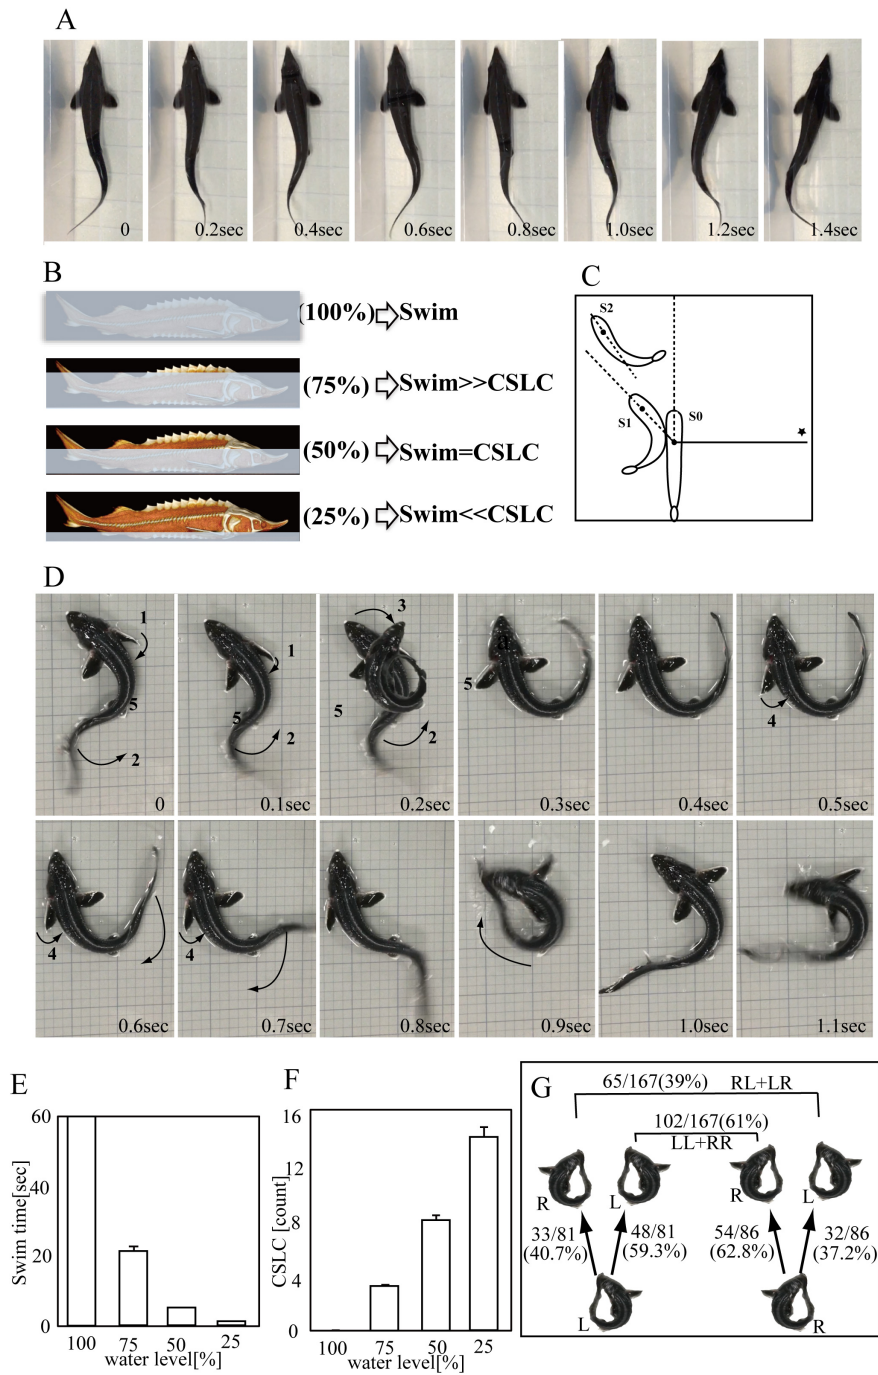

359

360 **Figure 1.**

361 Changes in water-level-dependent locomotion of a sturgeon.

362 (A) Swimming underwater. (B) Changes in locomotion at different water levels. (C) Schematic  
363 diagram of C-start escape response during underwater swimming. Numbers indicate the order  
364 of motions. S0: The point where the fish received a stimulus. S1: C-shaped escape behaviour.  
365 S2: The position of escape using a rebound. \* Position of the sound source. (D) Sequential  
366 photographs of C-start-like crawling (CSLC) motion. (E) Swimming time in one minute at  
367 each water level. (F) CSLC measurement in one minute at each water level. (G) Schematic  
368 diagram of the rate of C-start escape response on the land.

369

370

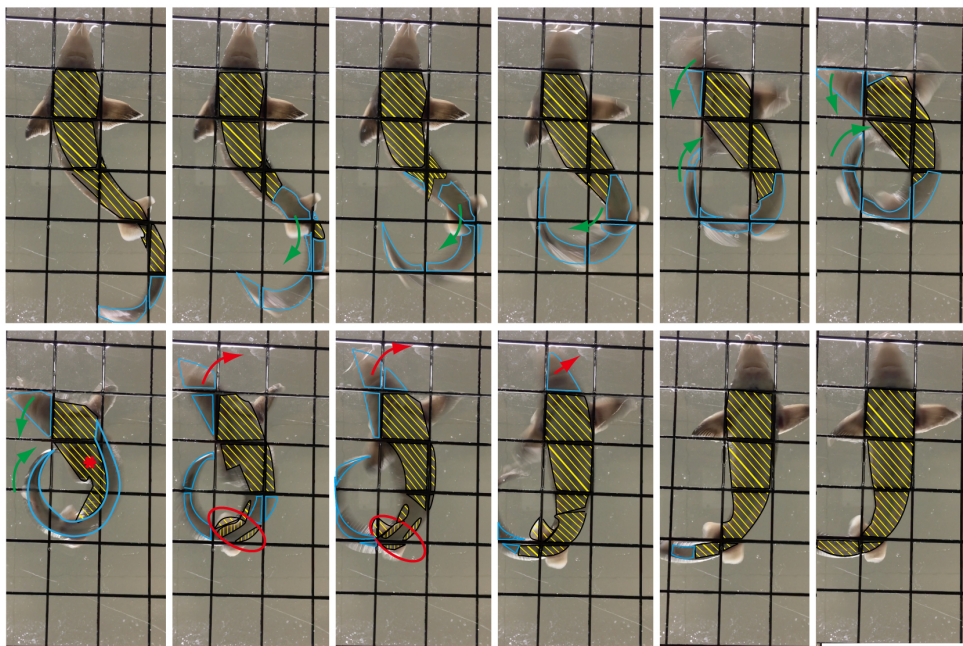

371

372 **Figure 2.**

373 Sequential ventral photographs of C-start-like crawling (CSLC) motion.

374 Observation of the bottom surface of sturgeons during CSLC. The area surrounded by a light

375 blue line indicates the area that is not in contact with the ground. The yellow shaded region is in



376 contact with the ground. The red circle indicates the loaded pelvic fin region. \* Position of ZMP.

377 The green arrows and red arrows indicate the direction of lateral bending.

378

379

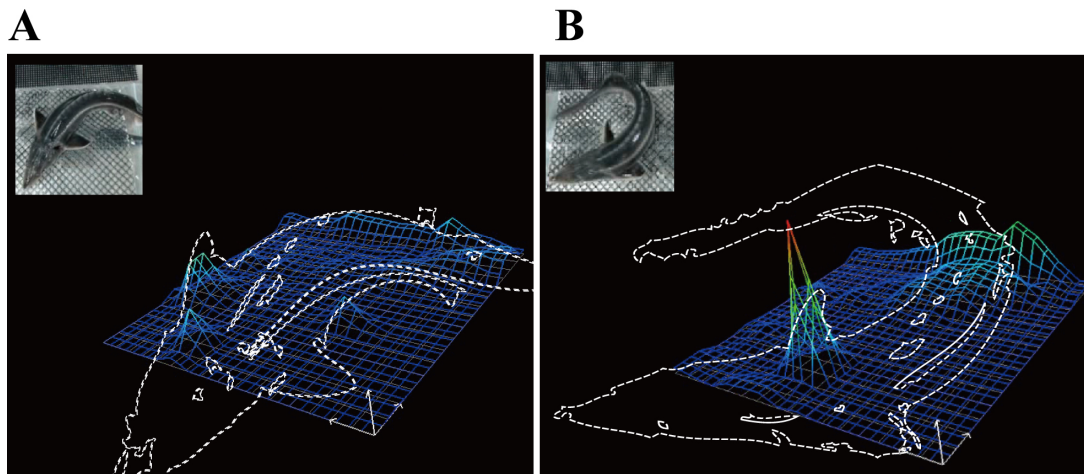

380

381 **Figure 3.**

382 Detection of floor-reaction forces in the CSLC of sturgeons.

383 (A) A weak load was detected under some regions of whole sturgeons. (B) A temporary strong

384 load was detected under the pectoral and pelvic fin region of sturgeons.

385

386

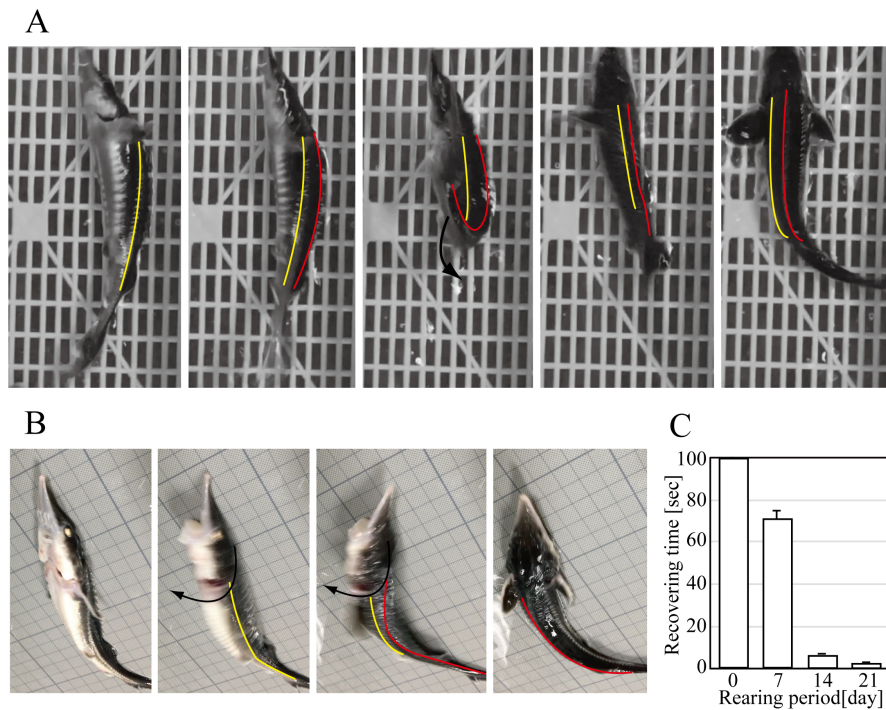

387

388 **Figure 4.**

389 Development of locomotion.

390 (A) Rolling-over using C-start escape response. (B) Rolling-over using twisting force. The red lines

391 indicate the dorsal side of the trunk, and the yellow lines indicate the lateral side of the trunk. (C) The

392 recovery time decreased depending on the exposure period.

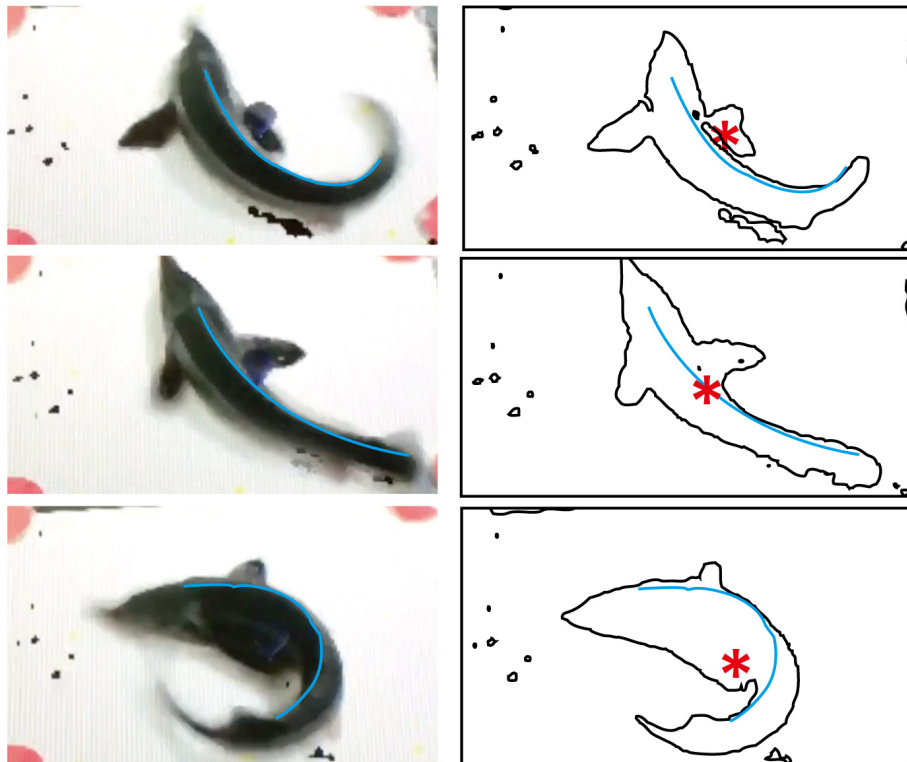

393

394 **Figure 5.**

395 Changes in the barycentric centre and load in the locomotion process during exposure to low water  
396 levels.

397 Detection of the position of the barycentric centre during CSLC locomotion. The left panel is the still  
398 image from the movie file. The right panel is the outline of the image in the left panel. \* Position of ZMP.

399

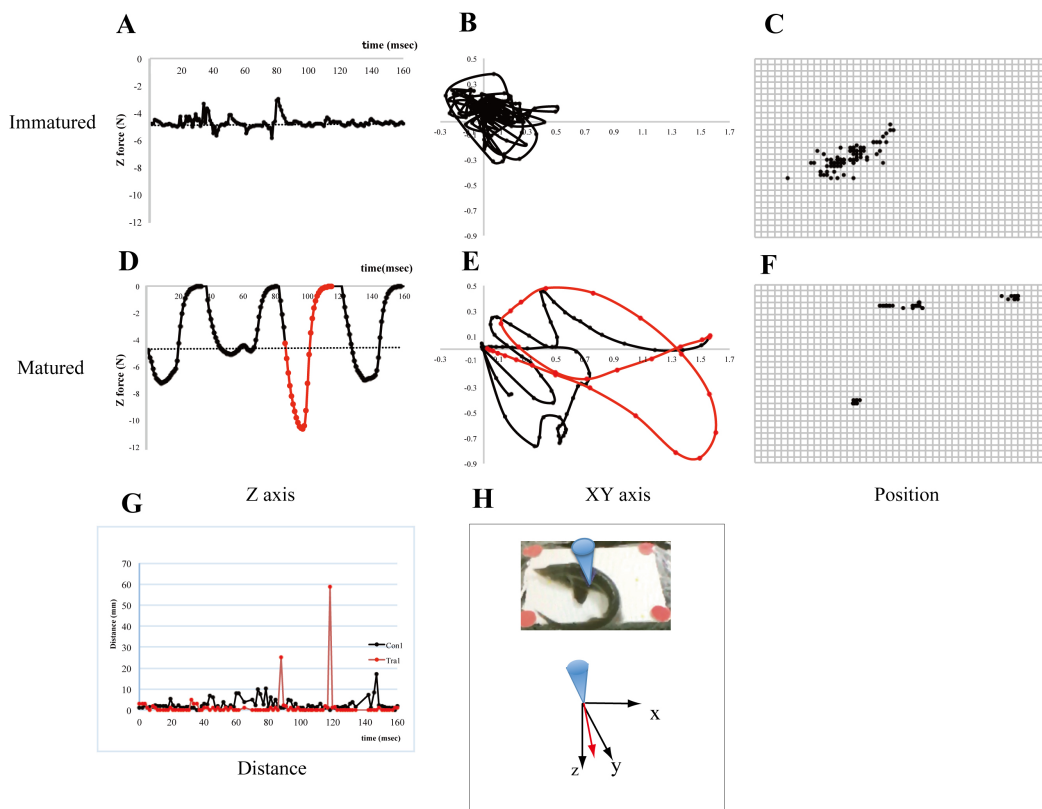

400

401 **Figure 6.**

402 Measurement of the direction and magnitude of the force of ZMP in CSLC using a tactile sensor.

403 After long-term exposure to low water levels, the sturgeons could apply more load in the vertical

404 direction (A and D) and change the loads more in the horizontal direction (B and E), compared with the

405 sturgeons immediately after exposure. The position of ZMP changed gradually with short moving

406 distances in the sturgeons immediately after exposure (C and G), whereas the sturgeons after long-term

407 exposure did not usually move much and changed their position significantly only when they moved (F

408 and G). Changes in the vertical loads in CSLC at the ZMP point over time (A and D). The dashed line

409 indicates the level of its weight. (B) and (E): Temporal changes in the direction of horizontal forces in

410 CSLC. (C) and (F): Distribution of ZMP in CSLC. (G) Moved distance of ZMP. (H) Schematic diagram

411 of the Haptic Cutting Board system device. The upper panel shows an immature locomotion group (A, B,

412 and C) and the lower panel mature locomotion group (D, E, and F), Con: control group, Tra:

413 low-water-level exposed group. The red lines in B and E indicate the same time point.

414

415 **Supplementary information**

416

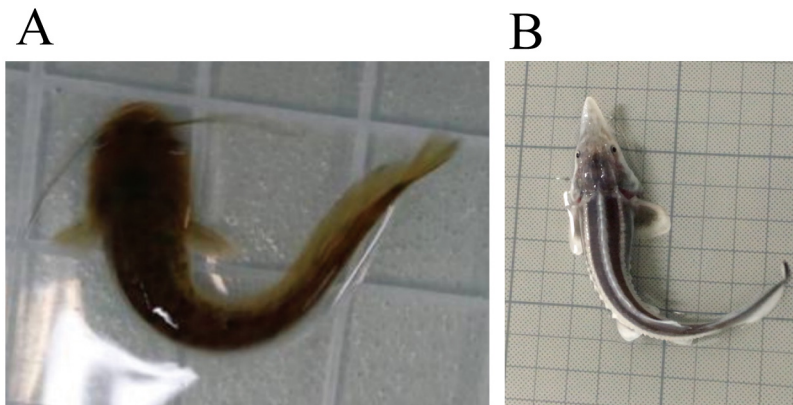

418 **Figure S1.**

419 C-start escape response of catfish and juvenile sturgeons.

420 (A) Catfish. (B) Juvenile sturgeon.

421

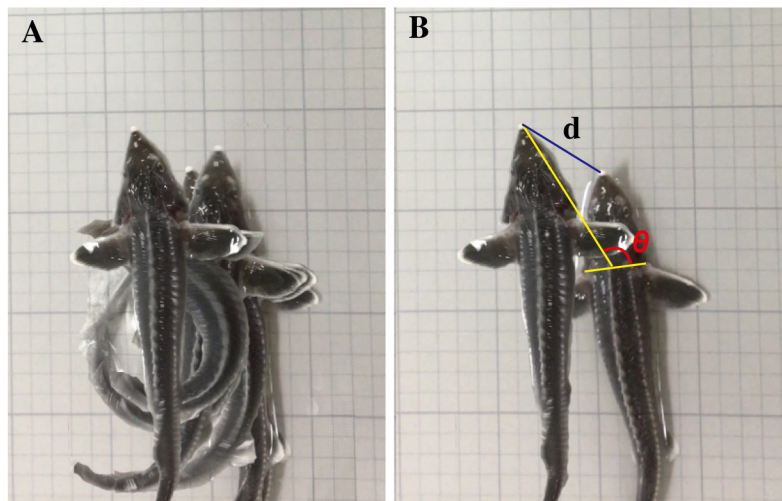

423 **Figure S2.**

424 C-start escape response of sturgeons.

425 (A) Overlapped sequential photographs showing the “C-start-like crawling” (CSLC) movement.  
426 (B) Start and end positions of CSLC. The black line (d) indicates the distance moved using  
427 CSLC. The yellow and red lines indicate the change in angle with CSLC ( $\theta$ ).  
428

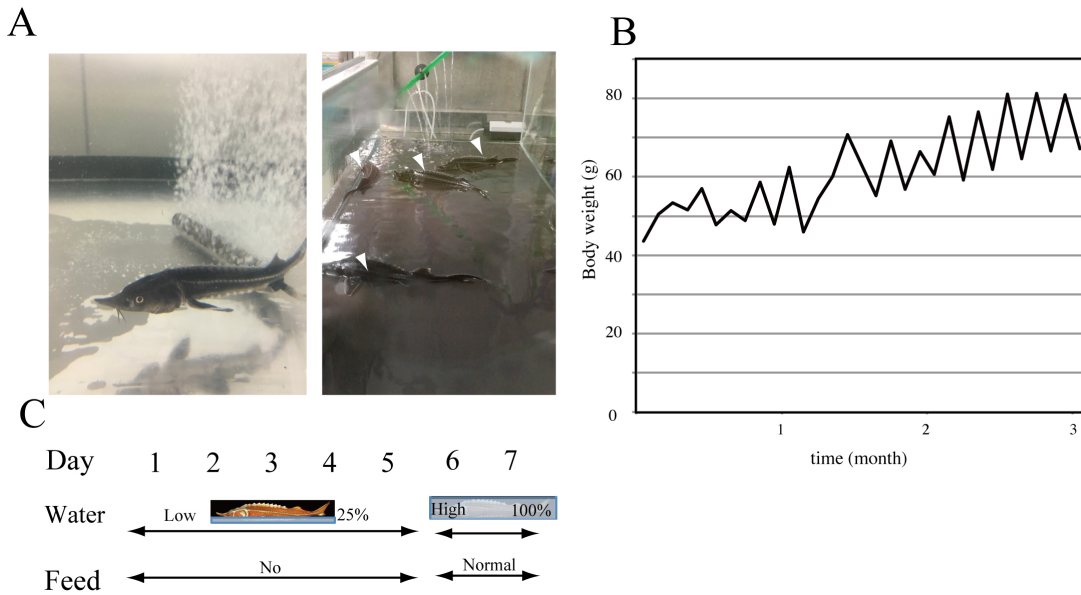

429  
430 **Figure S3.**

431 Changes in average body weight.

432 (A) Sturgeon swimming underwater (left) and during exposure to low water levels (right). (B)  
433 Comparison between average body weight (g) and time (months); the average body weight of  
434 the sturgeon decreased during low-water-level exposure and increased during the return to  
435 higher water levels. (C) Schedule of the one-week rearing experiment.

436

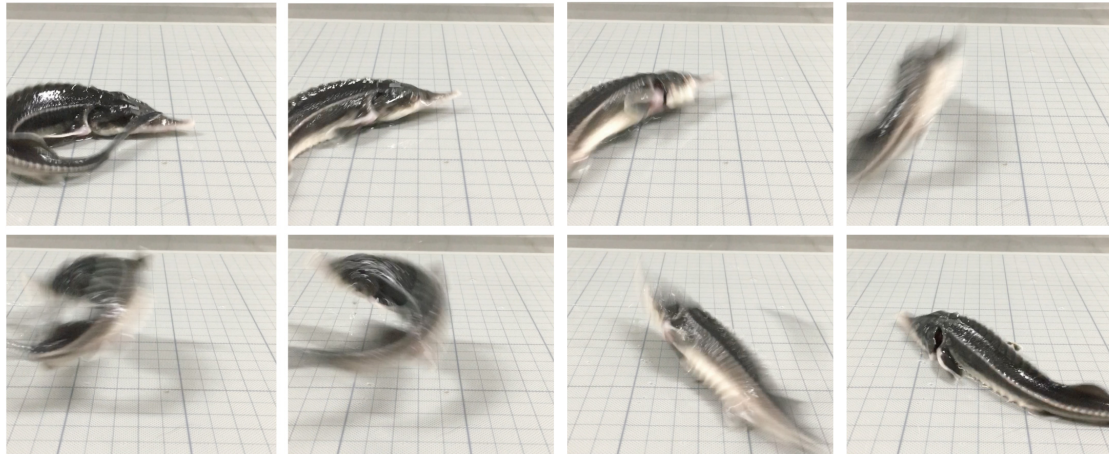

437

438 **Figure S4.**

439 Sequential photographs of developmental locomotion.

440

441 **Movie S1**

442 The crawling movement and reflex response herein called the C-start escape response.

443

444 **Movie S2**

445 Sturgeon crawling with fully expanded pectoral fins.

446
